# Supplementary material for: C2-symmetric benzene-based hydrogels with unique layered structures for controllable organic dye adsorption
Source: Royal Society of Chemistry journal article supplement (doi:10.1039/c2sm06927j), 2012-01-01
Supplement: c2sm06927j.pdf [file c2sm06927j.pdf]

## Supporting Information

### C<sub>2</sub>-symmetric benzene-based hydrogels with unique layered structures for controllable organic dye adsorption

Xiaoqiu Dou,<sup>a</sup> Ping Li,<sup>a</sup> Di Zhang,<sup>a</sup> June Mercer-Chalmers,<sup>b</sup> and Chuan-Liang Feng<sup>a\*</sup>

<sup>a</sup>State Key Lab of Metal Matrix Composites, School of Materials Science and Engineering, Shanghai Jiao Tong University, 800 Dongchuan Road, Shanghai 200240, China. E-mail: clfeng@sjtu.edu.cn

<sup>b</sup>University of Bath, Department of Chemistry, Biophysical Sciences Group, Claverton Down, Bath, BA2 7AY, United Kingdom.

#### **A) Abbreviations**

DCM = Dichlormethane

MB = Methylene blue

MV = Methy violet 2B

IC = Indigo carmine

ACBK = Acid chrome blue K

#### **B) Experimental section**

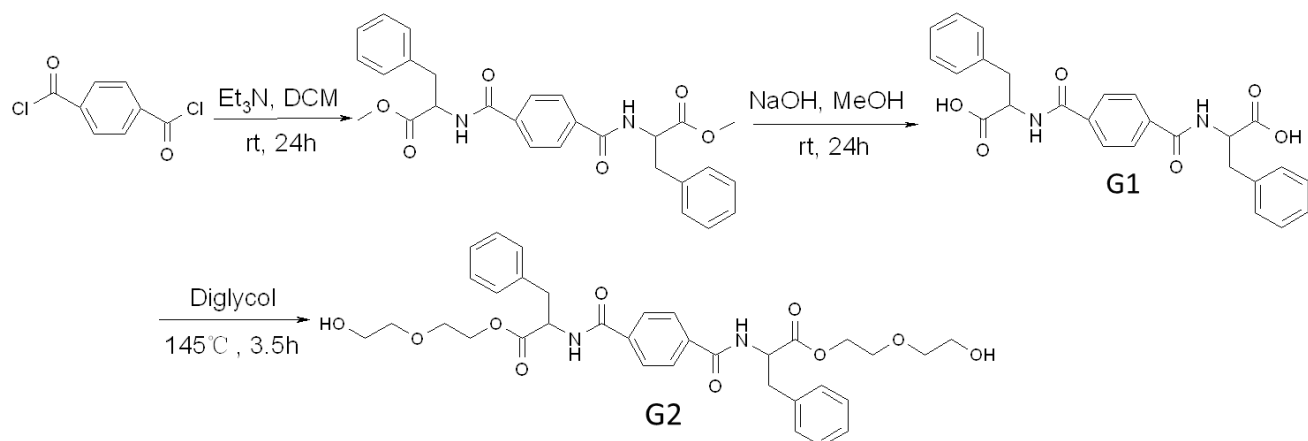

**Scheme S-1.** Synthetic route of G1 and G2

### C) Mass spectra of the compounds

(a)

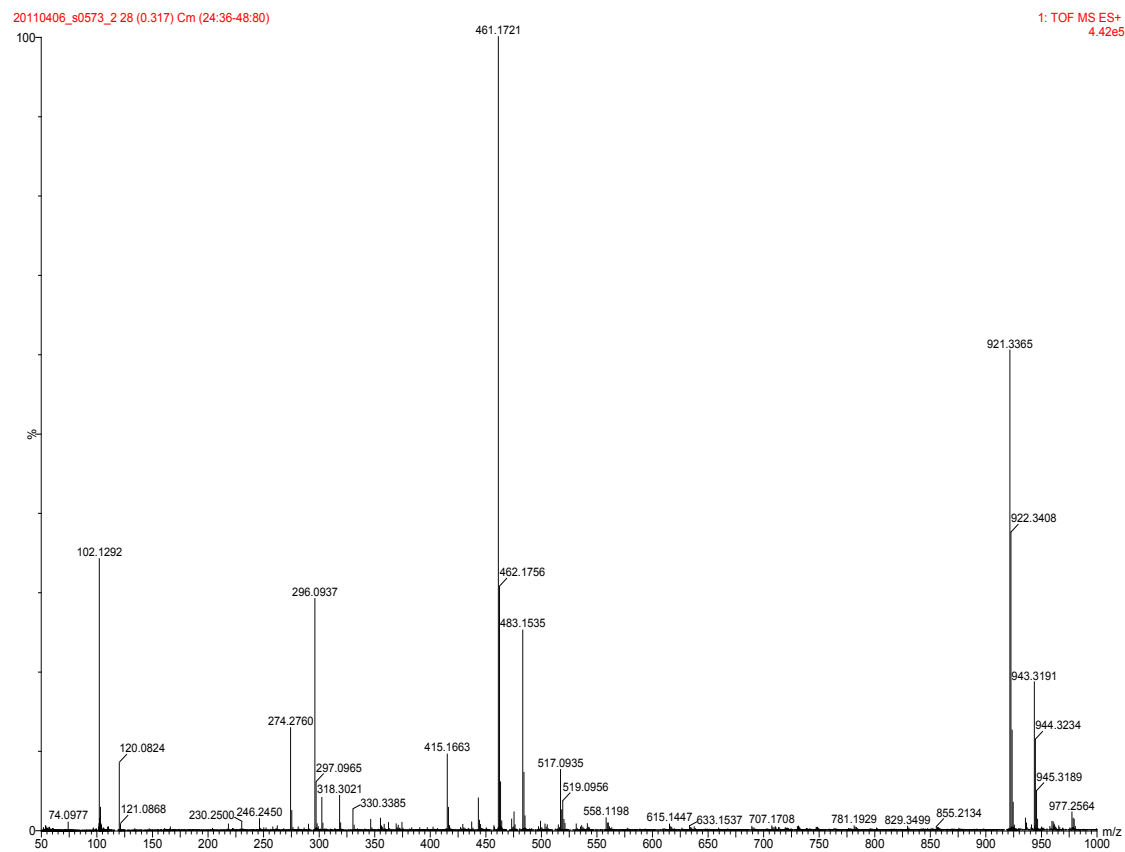

(b)

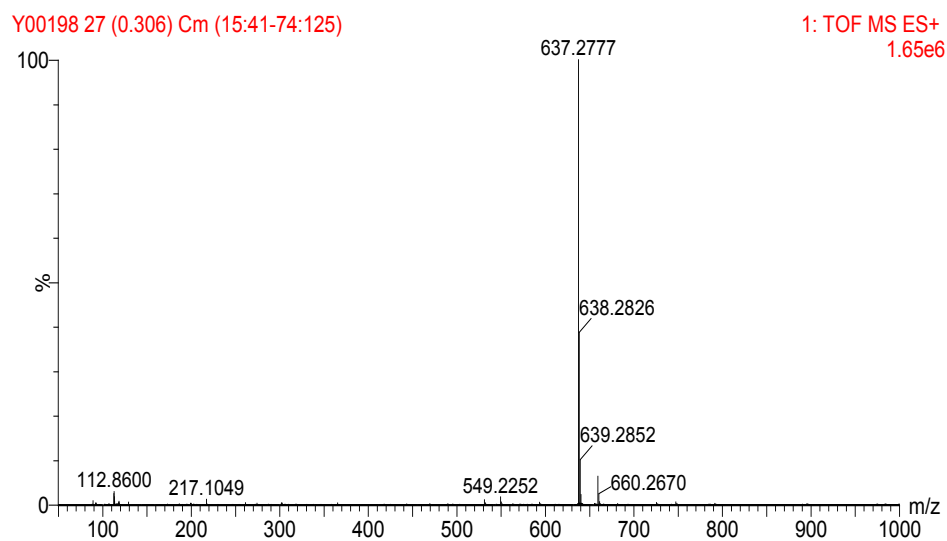

Figure S-1. Mass spectra of (a) G1, (b) G2

### D) $pH_{gs}$ values of G1

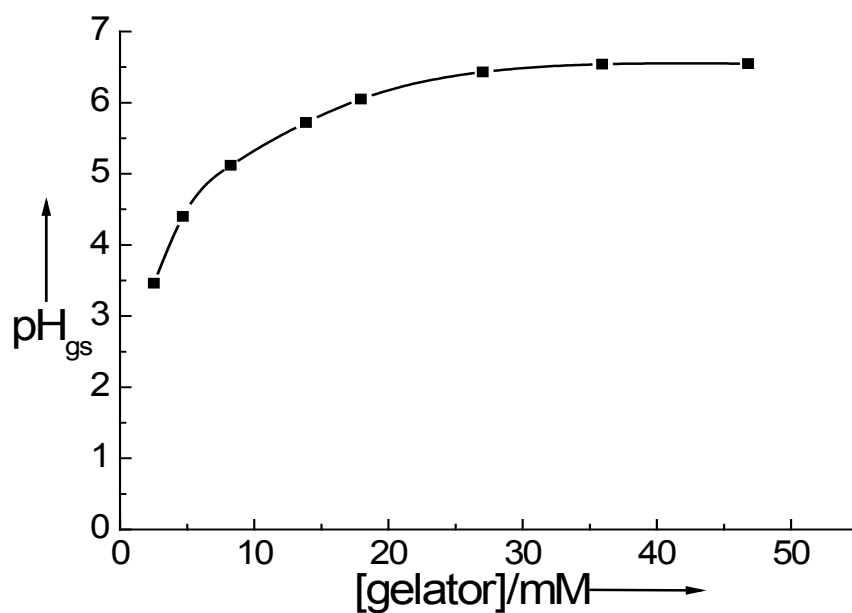

Figure S-2.  $pH_{gs}$  values for hydrogel of different concentrations of G1

### E) Surface areas of G1 and G2

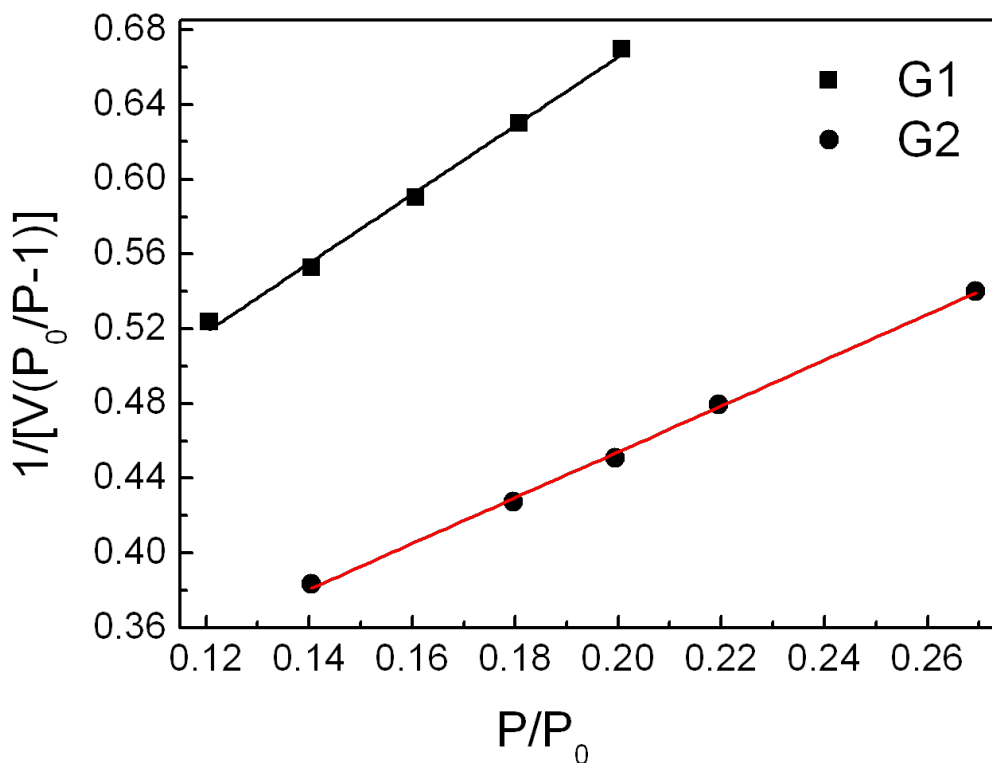

Figure S-3.  $N_2$  adsorption isotherm linear plots of G1 and G2

### F) FT-IR spectra of G1 and G2

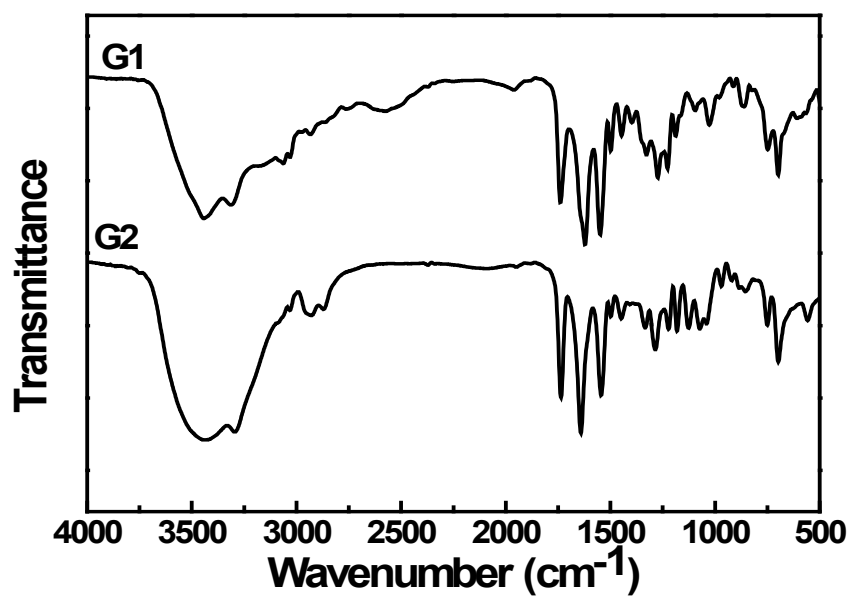

Figure S-4. FT-IR spectra obtained from G1 and G2 xerogel

### G) Dye adsorption studies

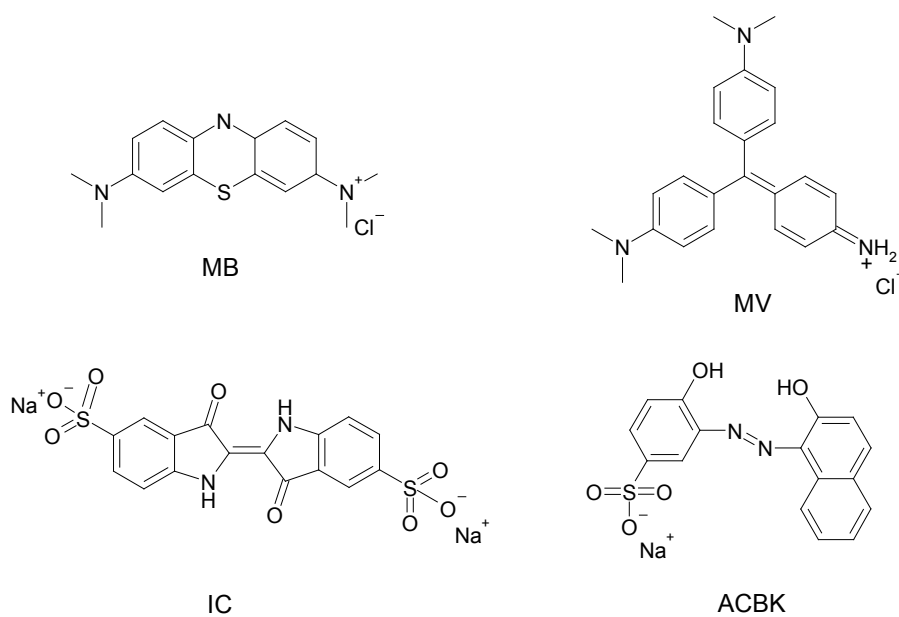

Scheme S-2. Structure of the dyes used in the experiment reported in the Table 1

**Table S-1.** SAXS data for xerogel G1 before and after adsorbing MB, MV, and G2

| Sample | Constant | 2 $\theta$ (°) |     |     | d (Å) |      |      |
|--------|----------|----------------|-----|-----|-------|------|------|
|        |          |                |     |     |       |      |      |
| G1     |          | 2.4            | 4.9 |     | 36.3  |      | 18.1 |
| G1-MB  |          | 2.4            | 4.9 |     | 36.6  |      | 18.2 |
| G1-MV  |          | 2.4            | 4.8 |     | 36.6  |      | 18.3 |
| G2     |          | 4.6            | 8.3 | 9.1 | 19.2  | 10.7 | 9.7  |

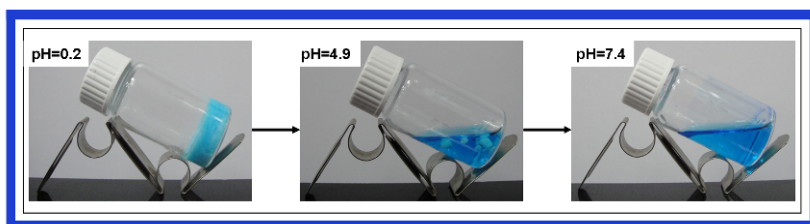

**Figure S-5.** The release of MB with the increase of system pH value.
